# Supplementary material for: Fatty acid synthase mediates EGFR palmitoylation in EGFR mutated non‐small cell lung cancer
Source: PubMed Central journal article supplement (PMC5840543; doi:10.15252/emmm.201708313), 2018-02-15
Supplement: EMMM-10-e8313-s001.pdf [file EMMM-10-e8313-s001.pdf]

# **Fatty Acid Synthase mediates EGFR palmitoylation in EGFR mutated Non Small Cell Lung Cancer**

Azhar Ali, Elena Levantini, Teo Jun Ting, Julian Goggi, John G. Clohessy, Wu Chan Shuo, Polly Chen Leilei, Henry Yang, Indira Krishnan, Olivier Kocher, Zhang Junyan, Ross Soo, Kishore Bhakoo, Chin Tan Min, Daniel G Tenen

## **Appendix**

| <b>Table of contents</b>      | <b>Page</b> |
|-------------------------------|-------------|
| Appendix Fig S1 with legend   | 1           |
| Appendix Fig S2 with legend   | 2           |
| Appendix Fig S3 with legend   | 3-4         |
| Appendix Fig S4 with legend   | 5-6         |
| Appendix Fig S5 with legend   | 7           |
| Appendix Fig S6 with legend   | 8-9         |
| Appendix Fig S7 with legend   | 10          |
| Appendix Fig S8 with legend   | 11          |
| Appendix Fig S9 with legend   | 12-13       |
| Appendix Fig S10 with legend  | 14          |
| Appendix Fig S11 with legend  | 15          |
| Appendix Fig S12 with legend  | 16          |
| Appendix Fig S13 with legend  | 17          |
| Appendix Fig S14 with legend  | 18          |
| Appendix Fig S15 with legend  | 19          |
| Appendix Fig S16 with legend  | 20          |
| Appendix Fig S17 with legend  | 21          |
| Appendix Fig S18 with legend  | 22          |
| Appendix Fig S19 with legend  | 23-29       |
| Appendix Table S1 with legend | 30          |
| Appendix Table S2 with legend | 31          |

|                               |    |
|-------------------------------|----|
| Appendix Table S3 with legend | 32 |
| Appendix Table S4 with legend | 33 |

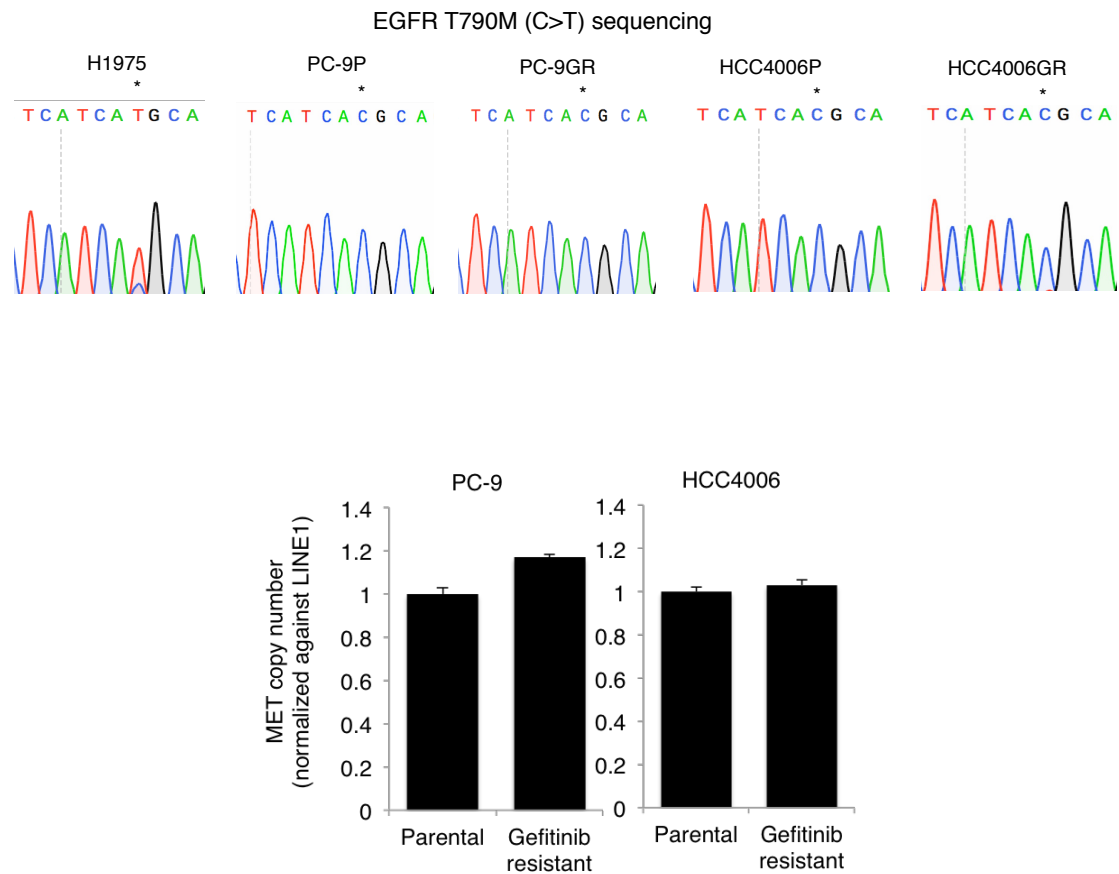

**Appendix Fig S1.** DNA analyses of PC-9 and HCC4006 cells to determine EGFR T790M mutation and MET amplification status. H1975 acts as positive control for EGFR T790M sequencing.

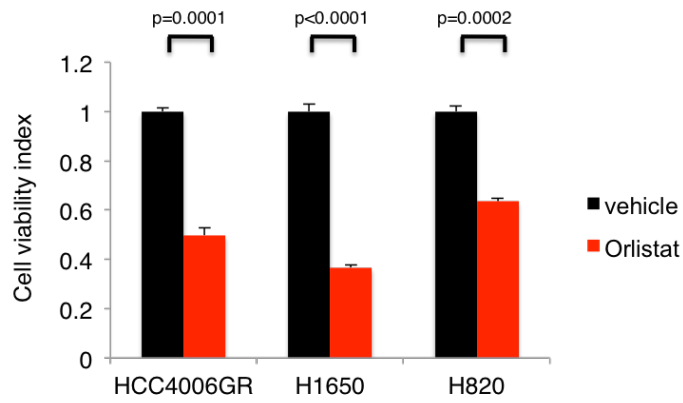

**Appendix Fig S2.** Cell viability assays showing the effects of Orlistat on HCC4006GR, H1650 and H820 EGFR mutated NSCLC cells with TKI resistance. Cells were exposed to 100  $\mu$ M of Orlistat for 72 h. Significance in differences in viability indexes, in which vehicle acted as control, was determined by t test.

**A**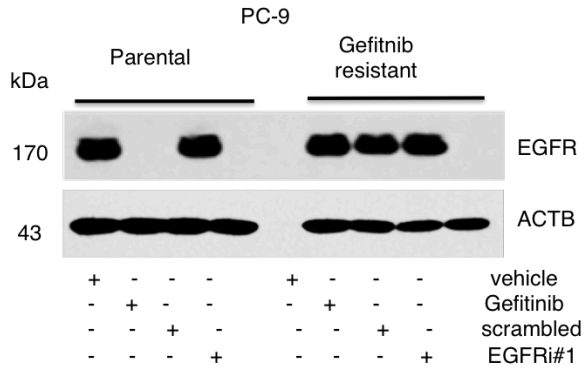**B**

EGFRi#1 siRNAs targeting sequence -  
5' **CAGGA**ACTGGATATTCTGAAA '3

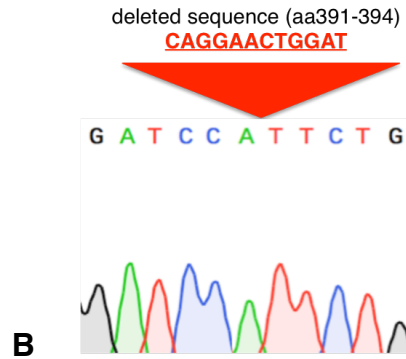**C**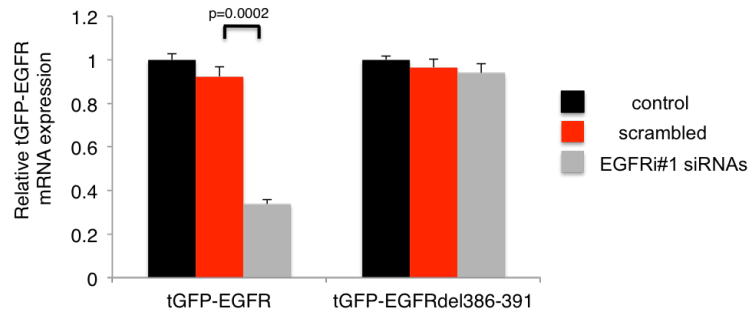**D**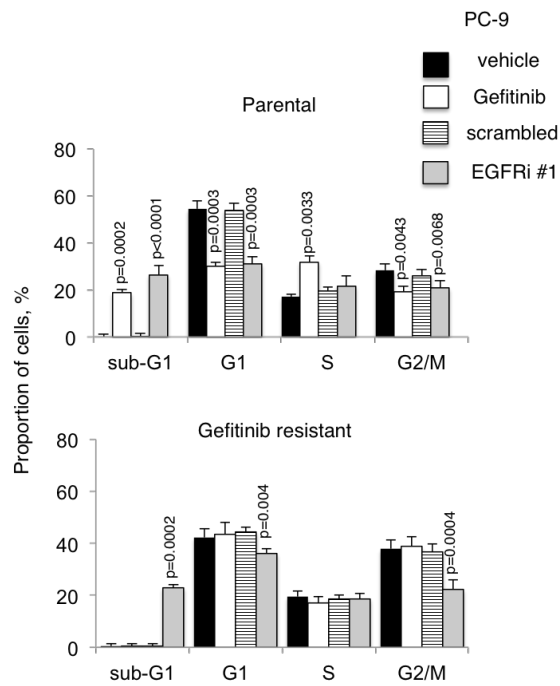

**Appendix Fig S3.** Generation of EGFRi#1 resistant EGFR cDNA to validate EGFRi#1 siRNAs specificity.

**A.** Western blot data showing parental and Gefitinib resistant PC-9 cells exposed to gefitinib (50 nM), and 25 nM of scrambled siRNAs, or EGFR siRNAs for 72 h. ACTB was selected as a housekeeping gene control.

**B.** EGFRi#1 resistant tGFP-tagged EGFR cDNA (EGFRdel386-391) was generated by deleting 12 of 21 nucleotides of the EGFR sequence (underlined in red) targeted by EGFRi#1 siRNAs by site-directed mutagenesis. The success of mutagenesis was verified by sequencing, as shown in the sequencing chromatogram.

**C.** Quantitative PCR showing that tGFP-tagged EGFRdel386-391 was resistant/untargetable to EGFRi#1 siRNAs, when compared to tGFP-tagged EGFR. NL20 cells were co-transfected with tGFP-tagged EGFR or tGFP-tagged EGFRdel386-391, and EGFRi#1 siRNAs for 72 h. This was followed by cell harvesting, RNA isolation and the measurement of tGFP-tagged EGFR mRNAs using tGFP-specific primers (**Table S4**). Significance in differences in mRNA expression, in which scrambled acted as control, was determined by t test.

**D.** Cell cycle analysis of parental and gefitinib resistant PC-9 cells exposed to either scrambled siRNAs or Gefitinib or EGFR siRNAs for 72 h. Significance in differences in percentages of cells, in which scrambled acted as control, was determined by t test.

**A**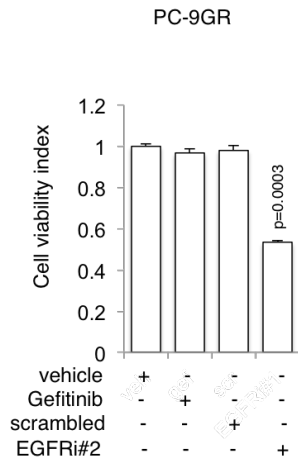**B**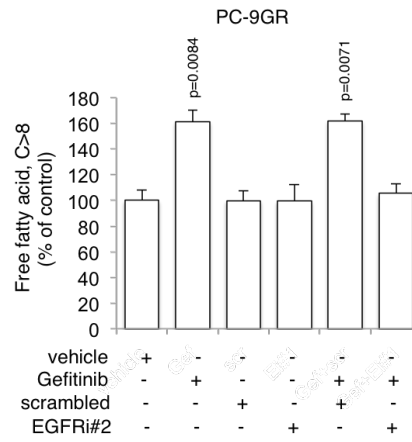**C**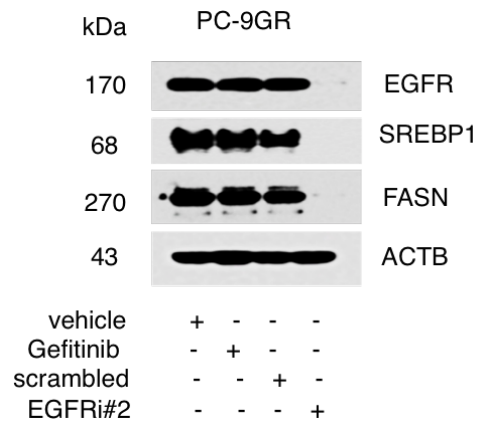

**Appendix Fig S4.** EGFR knockdown with a second EGFR siRNAs (EGFRi#2) in PC-9GR cells.

**A.** Cell viability assays on cells exposed to Gefitinib or EGFR siRNAs for 72 h.

Significance in differences in cell viability indices, in which scrambled acted as control, was determined by t test.

**B.** Measurement of cellular free fatty acid after Gefitinib treatment or EGFR

knockdown for 72 h. Significance in differences in FFAs levels, in which vehicle acted as control, was determined by t test.

**C.** Western blot analysis of cells treated with either vehicle, Gefitinib, scrambled or EGFR siRNAs for 72 h. ACTB was selected as a housekeeping gene control. Vehicle or scramble treated cells acted as controls.



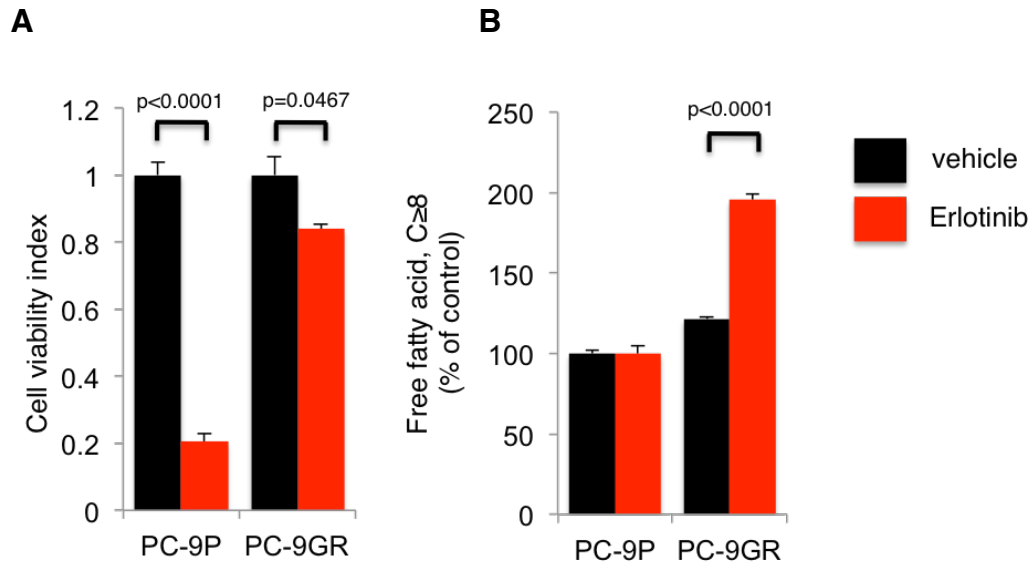

**Appendix Fig S5.** Cell viability and cellular FFAs measurement in PC-9P and PC-9GR cells treated with Erlotinib at 1  $\mu$ M for 72 h.

**A.** Cell viability assay.

**B.** Cellular FFAs assay.

Significance in differences in viability and FFAs levels, in which vehicle acted as control, was determined by t test.

**A**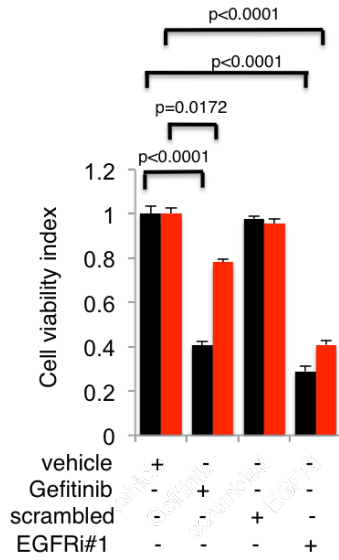**B**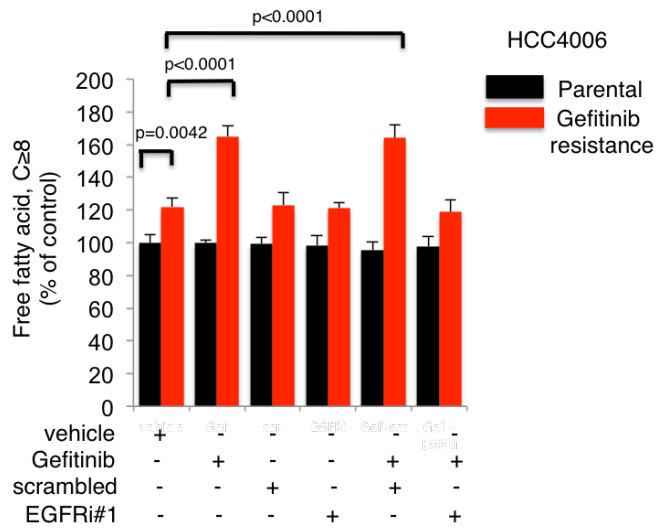**C**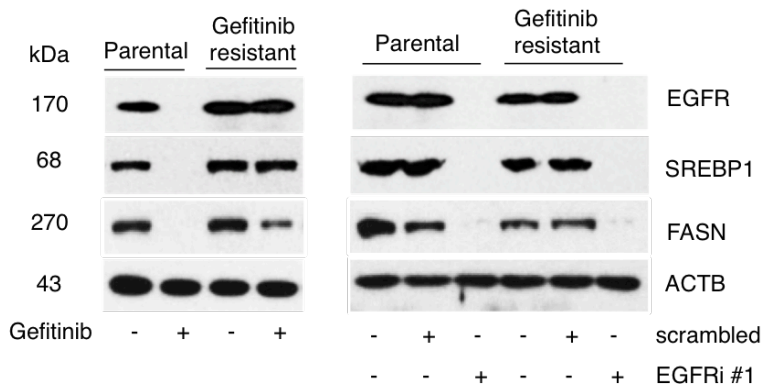

**Appendix Fig S6.** The EGFR-FASN signaling network is active in TKI resistant HCC4006GR NSCLC cells.

**A.** Cell viability assays to determine the effects of Gefitinib (1  $\mu$ M) or EGFR knockdown (EGFRi#1 at 25 nM) exposure on EGFR del746-749/A750P HCC4006GR cells after 72 h. Significance in differences in viability indexes, in which vehicle acted as control, was determined by t test.

**B.** Measurement of cellular free fatty acid (FFA) after Gefitinib or EGFR knockdown for 72 h. Significance in differences in cellular FFAs, in which vehicle acted as control,

was determined by t test. **C.** Western blot analysis of HCC4006P and HCC4006GR cells. Cells were treated with vehicle (-) or Gefitinib (+) for 72 h (left panel). Cells were exposed to either scrambled siRNA or EGFR siRNAs for 72 h (right panel). Vehicle or scrambled treated cells acted as controls. ACTB was selected as a housekeeping gene control.

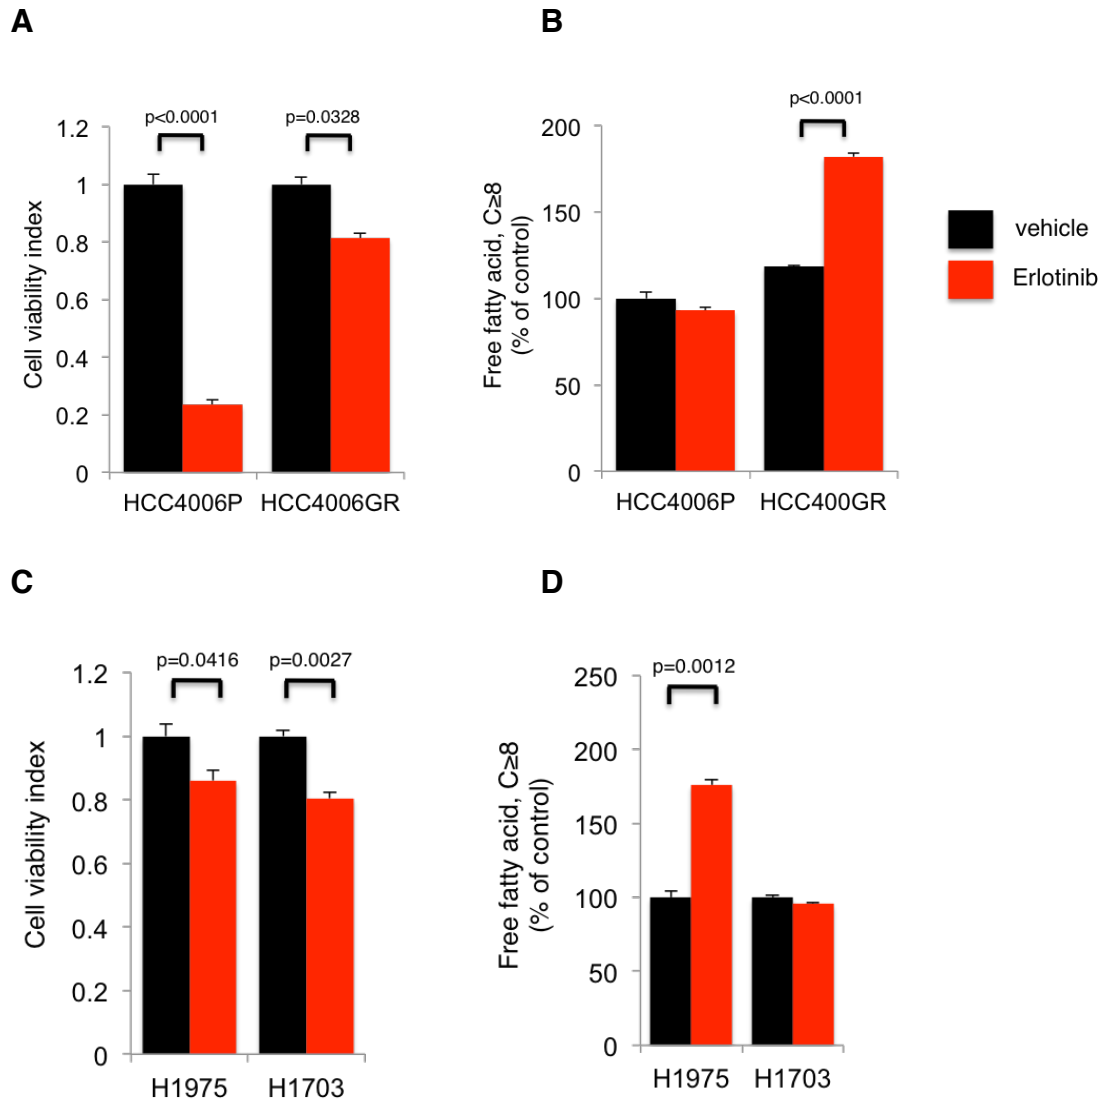

**Appendix Fig S7.** The effects of Erlotinib (at 1  $\mu$ M for 72 h) on cellular viability (**A and C**) and FFAs (**B and D**) in isogenic HCC4006, H1975 and H1703 NSCLC cells. Significance in differences in cellular viability and FFAs levels, in which vehicle acted as control, was determined by t test.

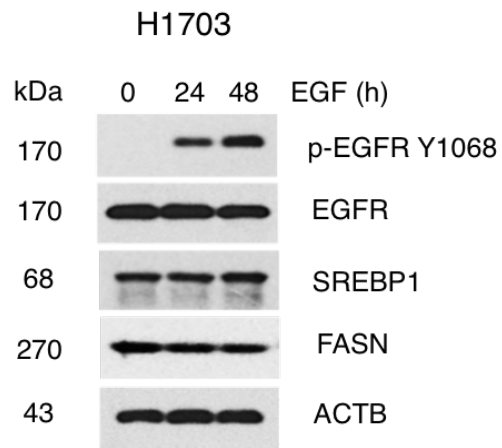

**Appendix Fig S8.** Western blot images showing phospho-EGFR (Y1068), total EGFR, SREBP1 and FASN expression after EGF (10 ng/ml) were added to starving H1703 cells at 0, 24 and 48 h. ACTB was selected as a housekeeping gene control.

**A**

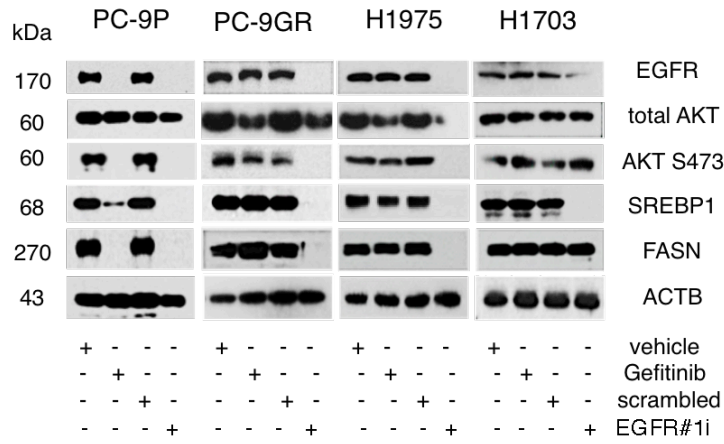

**B**

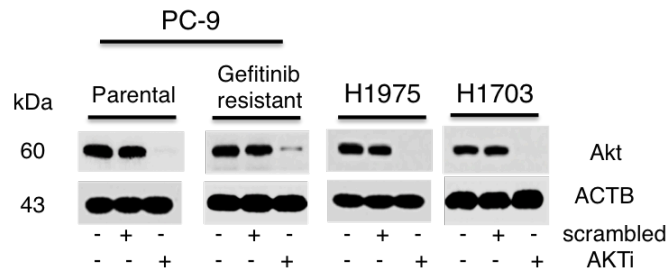

**C**

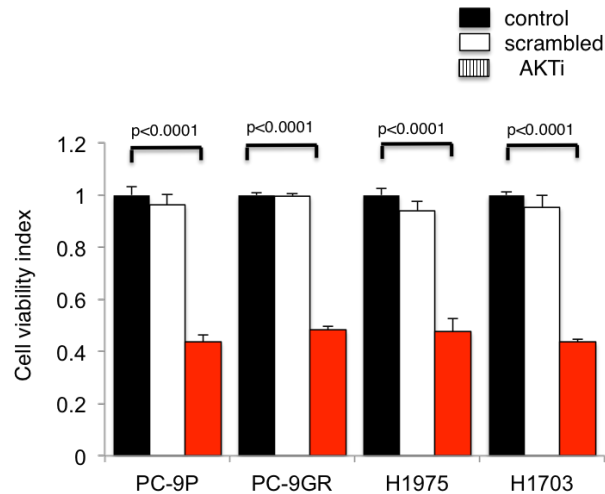

**Appendix Fig S9.** TKI resistance is associated with active Akt signaling in EGFR mutant cells.

**A.** Western blot analysis of protein lysates from cells exposed to either Gefitinib (50 nM for PC-9P; 1  $\mu$ M for PC-9GR, H1975, and H1703) or EGFR knockdown for 72 h.

Membranes were probed with antibodies against the indicated proteins. ACTB was selected as a housekeeping gene. Vehicle or scrambled treated cells acted as control.

**B.** Cells were exposed to scrambled or Akt siRNAs (AKTi) for 72 h followed by cell viability assays. Significance in differences in cellular viability, in which Scrambled-treated cells acted as control, was determined by t test.

**C.** NSCLC cells were treated with scrambled or Akt siRNAs for 72 h prior harvesting and subsequent Western blotting. ACTB was selected as a housekeeping gene control.

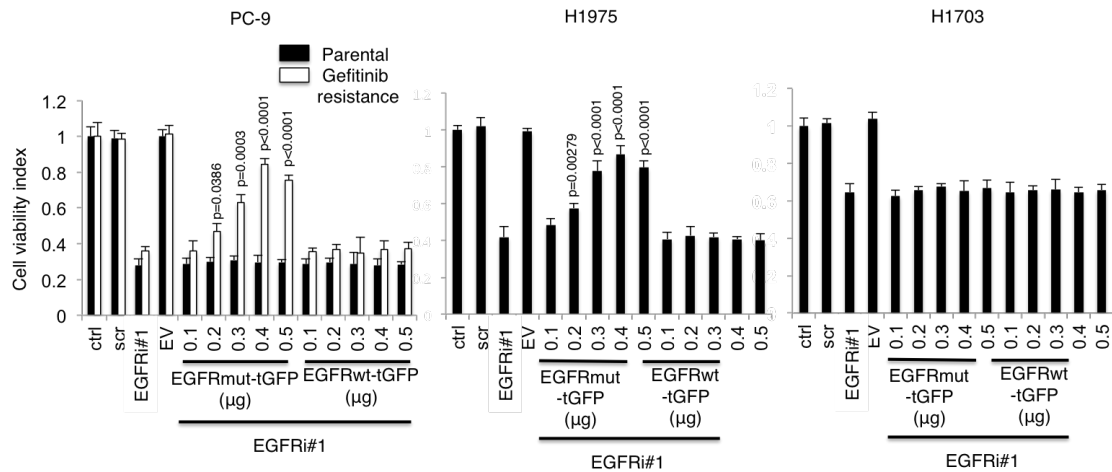

**Appendix Fig S10.** Cell viability assays of EGFR knockdown NSCLC cells transfected with either GFP-tagged EGFR wild type,  $\Delta$ E746-A750, or L858R/T790M constructs. Cells were allowed to attach overnight in 96-well format prior to transfection with EGFR siRNAs (EGFRi#1) for 12 h. This was followed by transfection with EGFR constructs ranging from 0.1 to 0.5  $\mu$ g in increments of 0.1  $\mu$ g for additional 60 h (for a total of 72 h). Significance in differences in cellular viability, in which EGFRi#1-treated cells acted as control, was determined by t test.



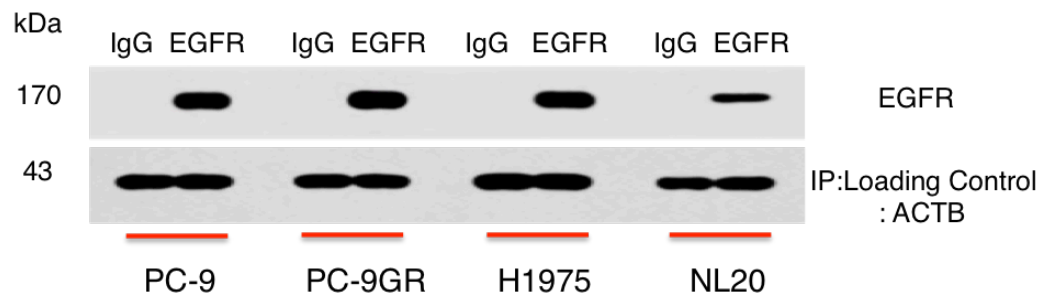

**Appendix Fig S11.** Western blotting showing immunoprecipitation of EGFR from NSCLC and immortalized nontransformed lung cells.

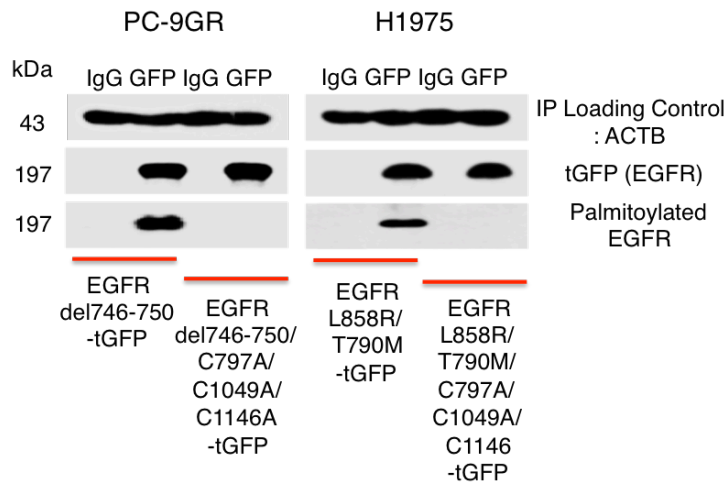

**Appendix Fig S12.** Western blot images showed palmitoylation status of EGFR in palmitoylation-deficient tGFP-tagged EGFR mutant (del746-750 and L858R/T790M) constructs that were mutated at cysteine residues 797, 1049 and 1146 to alanine.

**A**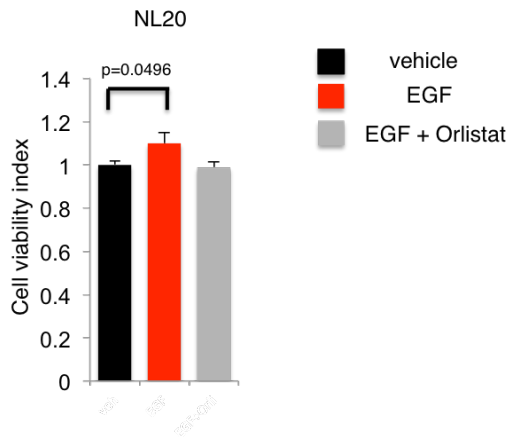**B**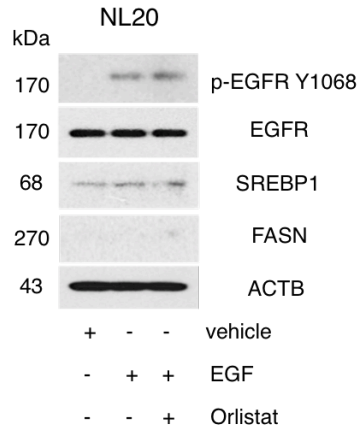

**Appendix Fig S13.** The effects of EGFR stimulation by EGF on NL20 cells. Cells were grown in reduced serum (1% FBS) for 48 h prior to the experiment.

**A.** Cell viability assays showing the NL20 cells exposed to vehicle, EGF (10 ng/ml) alone or EGF(10 ng/ml) and Orlistat (100  $\mu$ M) combination for 72 h. Significance in differences in cellular viability indices, in which vehicle acted as control, was determined by t test.

**B.** Western blot images showing phosphor-EGFR (Y1068), total EGFR, SREBP1 and FASN expression after vehicle, EGF (10 ng/ml) alone or EGF(10 ng/ml) and Orlistat (100  $\mu$ M) combination treatments in NL20 cells for 72 h. ACTB was selected as a housekeeping gene control.

**A**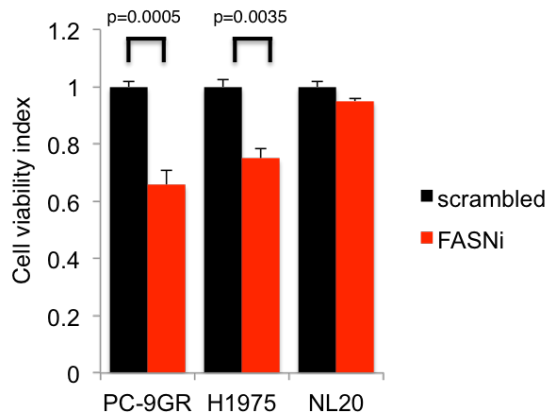**B**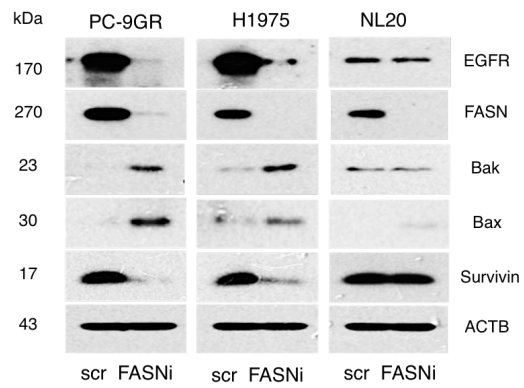

**Appendix Fig S14.** FASN knockdown by siRNAs in TKI resistant PC-9GR and H1975 cells.

**A.** Cell viability assays on the effect of FASN silencing (10 nM of FASN siRNAs) for 72 h) in NSCLC and NL20 cells. Significance in differences in cell viability indices, in which scrambled acted as control, was determined by t test.

**B.** Western blot analysis showing the effect of FASN silencing on EGFR, FASN, Bak, Bax and survivin expression. ACTB was selected as a housekeeping gene control.

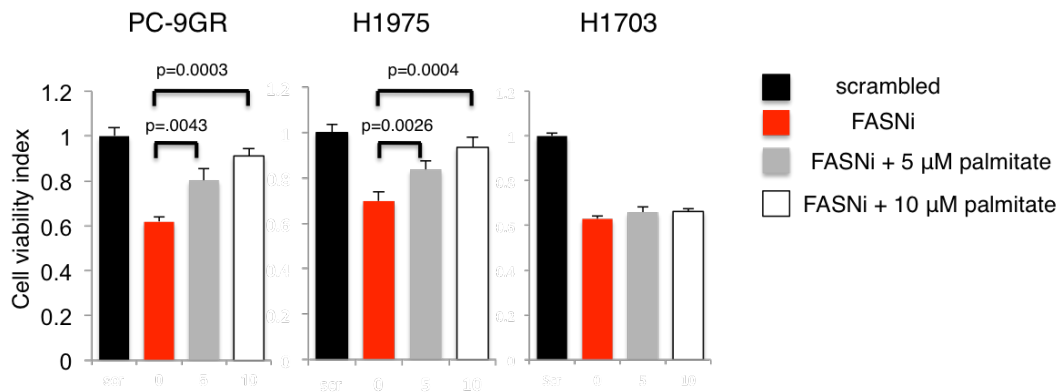

**Appendix Fig S15.** Cell viability assay showing the effects of exogenous palmitate supplementation to FASNi-treated PC-9GR, H1975 and H1703 NSCLC cells.

Significance in differences in cell viability indices, in which scrambled acted as control, was determined by t test.

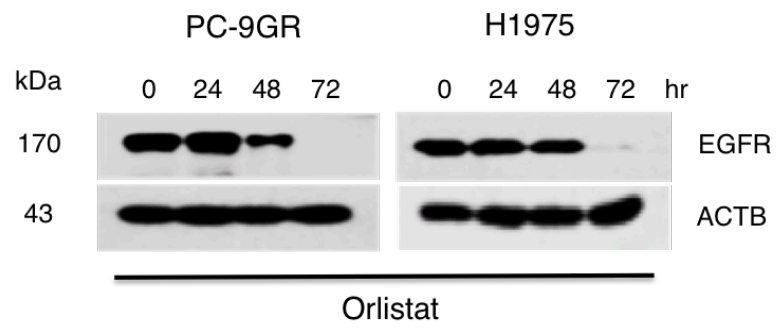

**Appendix Fig S16.** Western blot data showing EGFR expression after Orlistat (100  $\mu$ M) treatment, at 24, 48 and 72 h, in PC-9GR and H1975 NSCLC cells. ACTB was selected as a housekeeping gene control.

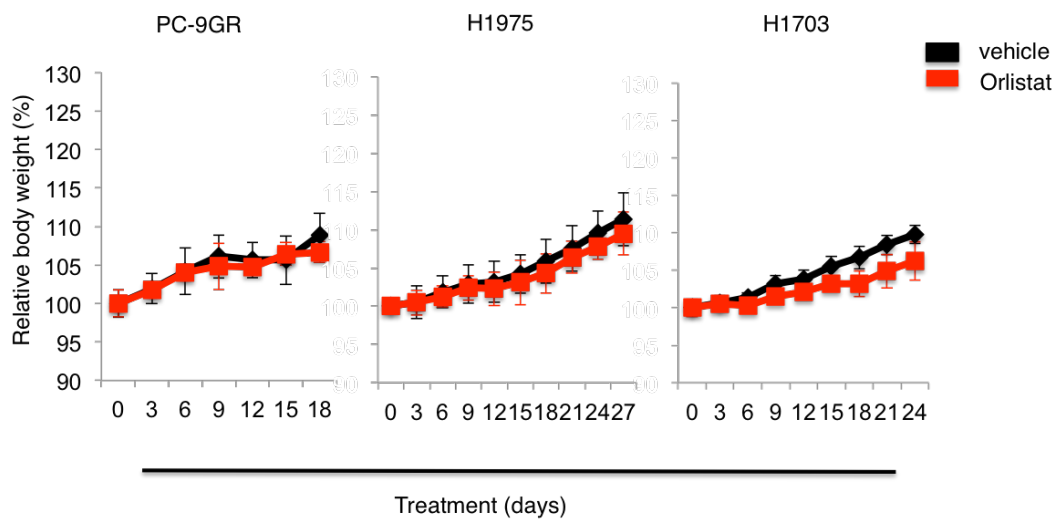

**Appendix Fig S17.** Comparison of body weight between vehicle- and Orlistat-treated mice carrying xenografts of PC-9GR and H1975 NSCLC cells. Orlistat – 240 mg/kg.

| <u>Sample</u>    | <u>Luminescence Ratio B/A</u> | <u>Conclusion</u> |
|------------------|-------------------------------|-------------------|
| Negative control | 0.195                         | negative          |
| Positive control | 92.42                         | positive          |
| PC-9P            | 0.297                         | negative          |
| PC-9GR           | 0.422                         | negative          |
| H1975            | 0.223                         | negative          |
| H1703            | 0.169                         | negative          |
| NL20             | 0.141                         | negative          |
| HCC4006P         | 0.164                         | negative          |
| HCC4006GR        | 0.212                         | negative          |
| H820             | 0.111                         | negative          |
| H1650            | 0.209                         | negative          |

**Intepretation of:**

**Ratio of B/A**

**<1  
1-1.2  
>1.2**

**negative  
borderline  
positive**

**Appendix Fig S18.** Results and Interpretation of MycoAlertT assay results on lung cells used in this study.



**Centre for Translational Research and Diagnostics**  
Centre for Translational Medicine Level 11  
National University of Singapore  
14 Medical Drive  
Singapore 117599  
Office: +65 65168055, Lab: +65 65165043, Fax: +65 68749664

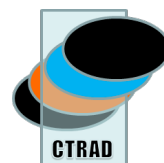

## Cell ID Report

|                |                    |
|----------------|--------------------|
| Prepared by:   | Sarah Low Hong Hui |
| Date Prepared: | 16 October 2013    |

### 1 Sample Information

|                           |      |
|---------------------------|------|
| Run Loading Number        | 18   |
| Sample ID                 | PC-9 |
| Additional ID Comments    | -    |
| Pellet/DNA                | -    |
| Estimated Cells in Pellet | -    |
| Received by               | -    |
| Date Pellet Received      | -    |
| Date DNA Received         | -    |
| DNA vol. ( $\mu$ l)       | -    |
| DNA conc. (ng/ $\mu$ l)   | -    |
| DNA quality (A260/280)    | -    |

DNA Extraction: DNeasy Blood and Tissue Kit (Qiagen, Hilden, Germany)  
DNA Analysis: Nanodrop ND1000 (Wilmington, DE)

### 2 Run Information

|                            |                              |
|----------------------------|------------------------------|
| Volume DNA Used ( $\mu$ l) | -                            |
| Amount DNA Used (ng)       | -                            |
| Run Date                   | 9 <sup>th</sup> October 2013 |
| Run File Name              | Kong_20131009                |

Cell ID Analysis: Cell ID system (Promega, Madison, WI)  
Capillary Electrophoresis: ABI 3130xl Genetic Analyser (Life Technologies, Foster City, CA)

**Centre for Translational Research and Diagnostics**  
Centre for Translational Medicine Level 11  
National University of Singapore  
14 Medical Drive  
Singapore 117599  
Office: +65 65168055, Lab: +65 65165043, Fax: +65 68749664

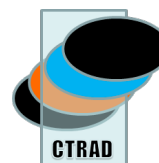

## Cell ID Report

|                |                    |
|----------------|--------------------|
| Prepared by:   | Sarah Low Hong Hui |
| Date Prepared: | 16 October 2013    |

### 1 Sample Information

|                           |       |
|---------------------------|-------|
| Run Loading Number        | 10    |
| Sample ID                 | H1703 |
| Additional ID Comments    | -     |
| Pellet/DNA                | -     |
| Estimated Cells in Pellet | -     |
| Received by               | -     |
| Date Pellet Received      | -     |
| Date DNA Received         | -     |
| DNA vol. ( $\mu$ l)       | -     |
| DNA conc. (ng/ $\mu$ l)   | -     |
| DNA quality (A260/280)    | -     |

DNA Extraction: DNeasy Blood and Tissue Kit (Qiagen, Hilden, Germany)  
DNA Analysis: Nanodrop ND1000 (Wilmington, DE)

### 2 Run Information

|                            |                              |
|----------------------------|------------------------------|
| Volume DNA Used ( $\mu$ l) | -                            |
| Amount DNA Used (ng)       | -                            |
| Run Date                   | 9 <sup>th</sup> October 2013 |
| Run File Name              | Kong_20131009                |

Cell ID Analysis: Cell ID system (Promega, Madison, WI)  
Capillary Electrophoresis: ABI 3130xl Genetic Analyser (Life Technologies, Foster City, CA)

**Centre for Translational Research and Diagnostics**  
 Centre for Translational Medicine Level 11  
 National University of Singapore  
 14 Medical Drive  
 Singapore 117599  
 Office: +65 65168055, Lab: +65 65165043, Fax: +65 68749664



## Cell ID Report

|                |                    |
|----------------|--------------------|
| Prepared by:   | Sarah Low Hong Hui |
| Date Prepared: | 16 October 2013    |

### 1 Sample Information

|                           |       |
|---------------------------|-------|
| Run Loading Number        | 11    |
| Sample ID                 | H1975 |
| Additional ID Comments    | -     |
| Pellet/DNA                | -     |
| Estimated Cells in Pellet | -     |
| Received by               | -     |
| Date Pellet Received      | -     |
| Date DNA Received         | -     |
| DNA vol. ( $\mu$ l)       | -     |
| DNA conc. (ng/ $\mu$ l)   | -     |
| DNA quality (A260/280)    | -     |

DNA Extraction: DNeasy Blood and Tissue Kit (Qiagen, Hilden, Germany)  
 DNA Analysis: Nanodrop ND1000 (Wilmington, DE)

### 2 Run Information

|                            |                              |
|----------------------------|------------------------------|
| Volume DNA Used ( $\mu$ l) | -                            |
| Amount DNA Used (ng)       | -                            |
| Run Date                   | 9 <sup>th</sup> October 2013 |
| Run File Name              | Kong_20131009                |

Cell ID Analysis: Cell ID system (Promega, Madison, WI)  
 Capillary Electrophoresis: ABI 3130xl Genetic Analyser (Life Technologies, Foster City, CA)

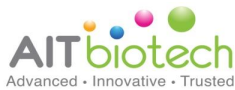

## Cell Line Authentication Service STR Profile Report

**Sample Submitted By:** Teo Jun Ting

**Email Address:** [teo.jun.ting83@gmail.com](mailto:teo.jun.ting83@gmail.com)

**Order ID:** AITB-CLA 001

**Cell Line Designation:** CRL-2871

**Date Sample Received:** 4th Oct 2017

**Report Date:** 13th Oct 2017

**Methodology:** Ten short tandem repeat (STR) loci plus the gender determining locus, Amelogenin, were amplified using the commercially available GenePrint® 10 System from Promega. The cell line sample was processed using the ABI Prism® 3730xl Genetic Analyzer. Data were analyzed using GeneMapper® 4.1 software (Applied Biosystems). Appropriate positive and negative controls were run and confirmed for each sample submitted. Known reference profiling against the ATCC STR database with the STR profile for your human cell line.

**Data Interpretation:** Cell lines were authenticated using Short Tandem Repeat (STR) analysis as described in 2012 in ANSI Standard (ASN-0002) by the ATCC Standards Development Organization (SDO) and in Capes-Davis et al., Match criteria for human cell line authentication: Where do we draw the line? Int. J. Cancer. 2012 Nov 8. doi: 0.1002/ijc.27931

| Test Results for Submitted Sample                                                                                                                                                                                                                                                    |                        |    |  | ATCC Reference Database Profile |    |  |     |
|--------------------------------------------------------------------------------------------------------------------------------------------------------------------------------------------------------------------------------------------------------------------------------------|------------------------|----|--|---------------------------------|----|--|-----|
| Loci                                                                                                                                                                                                                                                                                 | Query Profile: HCC4006 |    |  | Database Profile: CRL-2871      |    |  |     |
| TH01                                                                                                                                                                                                                                                                                 | 7                      |    |  | 7                               |    |  |     |
| D21S11                                                                                                                                                                                                                                                                               | 31                     |    |  |                                 |    |  |     |
| D5S818                                                                                                                                                                                                                                                                               | 12                     |    |  | 12                              |    |  |     |
| D13S317                                                                                                                                                                                                                                                                              | 11                     | 12 |  | 11                              | 12 |  |     |
| D7S820                                                                                                                                                                                                                                                                               | 9                      | 12 |  | 9                               | 12 |  |     |
| D16S539                                                                                                                                                                                                                                                                              | 11                     | 12 |  | 11                              | 12 |  |     |
| CSF1PO                                                                                                                                                                                                                                                                               | 10                     |    |  | 10                              |    |  |     |
| Amelogenin                                                                                                                                                                                                                                                                           | X                      |    |  | X                               |    |  |     |
| Vwa                                                                                                                                                                                                                                                                                  | 16                     | 17 |  | 16                              | 17 |  |     |
| TPOX                                                                                                                                                                                                                                                                                 | 8                      | 9  |  | 8                               | 9  |  |     |
| Number of shared alleles between query sample and database profile:                                                                                                                                                                                                                  |                        |    |  |                                 |    |  | 14  |
| Total number of alleles in the database profile:                                                                                                                                                                                                                                     |                        |    |  |                                 |    |  | 14  |
| Percent match between in the submitted sample and the database profile:                                                                                                                                                                                                              |                        |    |  |                                 |    |  | 100 |
| The alleles match algorithm compares the 8 core loci plus amelogenin only, even though alleles from all loci will be reported when available.                                                                                                                                        |                        |    |  |                                 |    |  |     |
| <b>NOTE:</b> Loci highlighted in grey (8 core STR loci plus Amelogenin) can be made public to verify cell identity. In order to protect the identity of the donor, please do not publish the allele calls from the STR loci tested. Electropherograms showing raw data are attached. |                        |    |  |                                 |    |  |     |

### Explanation of Test Results

Cell lines with  $\geq 80\%$  match are considered to be related; i.e., derived from a common ancestry.

Cell lines with between a 55% to 80% match require further profiling for authentication of relatedness.

- The submitted sample profile is human, but not a match for any profile in the ATCC STR database
- The submitted sample is an exact match for the following ATCC human cell line(s) in the ATCC STR database (8 core loci plus Amelogenin): CRL-2871
- The submitted sample is similar to the following ATCC human cell line(s):

|                                     |                        |
|-------------------------------------|------------------------|
| <b>Performed By Lab Technician:</b> | Jennifer Ng 13/10/2017 |
| <b>Reviewed By:</b>                 | Sathya 13/10/2017      |

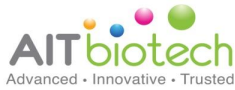

## Cell Line Authentication Service STR Profile Report

**Sample Submitted By:** Teo Jun Ting

**Email Address:** [teo.jun.ting83@gmail.com](mailto:teo.jun.ting83@gmail.com)

**Order ID:** AITB-CLA 001

**Cell Line Designation:** CRL-2503

**Date Sample Received:** 4th Oct 2017

**Report Date:** 13th Oct 2017

**Methodology:** Ten short tandem repeat (STR) loci plus the gender determining locus, Amelogenin, were amplified using the commercially available GenePrint® 10 System from Promega. The cell line sample was processed using the ABI Prism® 3730xl Genetic Analyzer. Data were analyzed using GeneMapper® 4.1 software (Applied Biosystems). Appropriate positive and negative controls were run and confirmed for each sample submitted. Known reference profiling against the ATCC STR database with the STR profile for your human cell line.

**Data Interpretation:** Cell lines were authenticated using Short Tandem Repeat (STR) analysis as described in 2012 in ANSI Standard (ASN-0002) by the ATCC Standards Development Organization (SDO) and in Capes-Davis et al., Match criteria for human cell line authentication: Where do we draw the line? Int. J. Cancer. 2012 Nov 8. doi: 0.1002/ijc.27931

| Test Results for Submitted Sample                                                                                                                                                                                                                                                    |                      |      |  | ATCC Reference Database Profile |    |  |     |
|--------------------------------------------------------------------------------------------------------------------------------------------------------------------------------------------------------------------------------------------------------------------------------------|----------------------|------|--|---------------------------------|----|--|-----|
| Loci                                                                                                                                                                                                                                                                                 | Query Profile: NL-20 |      |  | Database Profile: CRL-2503      |    |  |     |
| TH01                                                                                                                                                                                                                                                                                 | 6                    | 7    |  | 6                               | 7  |  |     |
| D21S11                                                                                                                                                                                                                                                                               | 29                   | 31.2 |  |                                 |    |  |     |
| D5S818                                                                                                                                                                                                                                                                               | 12                   |      |  | 12                              |    |  |     |
| D13S317                                                                                                                                                                                                                                                                              | 11                   | 12   |  | 11                              | 12 |  |     |
| D7S820                                                                                                                                                                                                                                                                               | 12                   |      |  | 12                              |    |  |     |
| D16S539                                                                                                                                                                                                                                                                              | 12                   |      |  | 12                              |    |  |     |
| CSF1PO                                                                                                                                                                                                                                                                               | 11                   |      |  | 11                              |    |  |     |
| Amelogenin                                                                                                                                                                                                                                                                           | X                    |      |  | X                               |    |  |     |
| Vwa                                                                                                                                                                                                                                                                                  | 14                   | 17   |  | 14                              | 17 |  |     |
| TPOX                                                                                                                                                                                                                                                                                 | 9                    | 11   |  | 9                               | 11 |  |     |
| Number of shared alleles between query sample and database profile:                                                                                                                                                                                                                  |                      |      |  |                                 |    |  | 13  |
| Total number of alleles in the database profile:                                                                                                                                                                                                                                     |                      |      |  |                                 |    |  | 13  |
| Percent match between in the submitted sample and the database profile:                                                                                                                                                                                                              |                      |      |  |                                 |    |  | 100 |
| The alleles match algorithm compares the 8 core loci plus amelogenin only, even though alleles from all loci will be reported when available.                                                                                                                                        |                      |      |  |                                 |    |  |     |
| <b>NOTE:</b> Loci highlighted in grey (8 core STR loci plus Amelogenin) can be made public to verify cell identity. In order to protect the identity of the donor, please do not publish the allele calls from the STR loci tested. Electropherograms showing raw data are attached. |                      |      |  |                                 |    |  |     |

**Explanation of Test Results**

Cell lines with ≥ 80% match are considered to be related; i.e., derived from a common ancestry.

Cell lines with between a 55% to 80% match require further profiling for authentication of relatedness.

- The submitted sample profile is human, but not a match for any profile in the ATCC STR database
- The submitted sample is an exact match for the following ATCC human cell line(s) in the ATCC STR database (8 core loci plus Amelogenin): CRL-2503
- The submitted sample is similar to the following ATCC human cell line(s):

|                                     |                        |
|-------------------------------------|------------------------|
| <b>Performed By Lab Technician:</b> | Jennifer Ng 13/10/2017 |
| <b>Reviewed By:</b>                 | Sathya 13/10/2017      |



## Cell Line Authentication Service STR Profile Report

**Sample Submitted By:** Teo Jun Ting

**Email Address:** [teo.jun.ting83@gmail.com](mailto:teo.jun.ting83@gmail.com)

**Order ID:** AITB-CLA 001

**Cell Line Designation:** HTB-181

**Date Sample Received:** 4th Oct 2017

**Report Date:** 13th Oct 2017

**Methodology:** Ten short tandem repeat (STR) loci plus the gender determining locus, Amelogenin, were amplified using the commercially available GenePrint® 10 System from Promega. The cell line sample was processed using the ABI Prism® 3730xl Genetic Analyzer. Data were analyzed using GeneMapper® 4.1 software (Applied Biosystems). Appropriate positive and negative controls were run and confirmed for each sample submitted. Known reference profiling against the ATCC STR database with the STR profile for your human cell line.

**Data Interpretation:** Cell lines were authenticated using Short Tandem Repeat (STR) analysis as described in 2012 in ANSI Standard (ASN-0002) by the ATCC Standards Development Organization (SDO) and in Capes-Davis et al., Match criteria for human cell line authentication: Where do we draw the line? Int. J. Cancer. 2012 Nov 8. doi: 0.1002/ijc.27931

| Test Results for Submitted Sample                                                                                                                                                                                                                                                    |                         |    |  | ATCC Reference Database Profile |    |     |  |
|--------------------------------------------------------------------------------------------------------------------------------------------------------------------------------------------------------------------------------------------------------------------------------------|-------------------------|----|--|---------------------------------|----|-----|--|
| Loci                                                                                                                                                                                                                                                                                 | Query Profile: NCI-H820 |    |  | Database Profile: HTB-181       |    |     |  |
| TH01                                                                                                                                                                                                                                                                                 | 8                       |    |  | 8                               |    |     |  |
| D21S11                                                                                                                                                                                                                                                                               | 30                      |    |  |                                 |    |     |  |
| D5S818                                                                                                                                                                                                                                                                               | 9                       | 11 |  | 9                               | 11 |     |  |
| D13S317                                                                                                                                                                                                                                                                              | 12                      |    |  | 12                              |    |     |  |
| D7S820                                                                                                                                                                                                                                                                               | 10                      | 13 |  | 10                              | 13 |     |  |
| D16S539                                                                                                                                                                                                                                                                              | 9                       | 11 |  | 9                               | 11 |     |  |
| CSF1PO                                                                                                                                                                                                                                                                               | 11                      | 12 |  | 11                              | 12 |     |  |
| Amelogenin                                                                                                                                                                                                                                                                           | X                       | Y  |  | X                               | Y  |     |  |
| Vwa                                                                                                                                                                                                                                                                                  | 18                      |    |  | 18                              |    |     |  |
| TPOX                                                                                                                                                                                                                                                                                 | 12                      |    |  | 12                              |    |     |  |
| Number of shared alleles between query sample and database profile:                                                                                                                                                                                                                  |                         |    |  |                                 |    | 14  |  |
| Total number of alleles in the database profile:                                                                                                                                                                                                                                     |                         |    |  |                                 |    | 14  |  |
| Percent match between in the submitted sample and the database profile:                                                                                                                                                                                                              |                         |    |  |                                 |    | 100 |  |
| The alleles match algorithm compares the 8 core loci plus amelogenin only, even though alleles from all loci will be reported when available.                                                                                                                                        |                         |    |  |                                 |    |     |  |
| <b>NOTE:</b> Loci highlighted in grey (8 core STR loci plus Amelogenin) can be made public to verify cell identity. In order to protect the identity of the donor, please do not publish the allele calls from the STR loci tested. Electropherograms showing raw data are attached. |                         |    |  |                                 |    |     |  |

**Explanation of Test Results**

Cell lines with ≥ 80% match are considered to be related; i.e., derived from a common ancestry.

Cell lines with between a 55% to 80% match require further profiling for authentication of relatedness.

- The submitted sample profile is human, but not a match for any profile in the ATCC STR database
- The submitted sample is an exact match for the following ATCC human cell line(s) in the ATCC STR database (8 core loci plus Amelogenin): HTB-181
- The submitted sample is similar to the following ATCC human cell line(s):

|                                     |                        |
|-------------------------------------|------------------------|
| <b>Performed By Lab Technician:</b> | Jennifer Ng 13/10/2017 |
| <b>Reviewed By:</b>                 | Sathya 13/10/2017      |



## Cell ID Report

|                |                    |
|----------------|--------------------|
| Prepared by:   | Sarah Low Hong Hui |
| Date Prepared: | 16 October 2013    |

### 1 Sample Information

|                           |       |
|---------------------------|-------|
| Run Loading Number        | 8     |
| Sample ID                 | H1650 |
| Additional ID Comments    | -     |
| Pellet/DNA                | -     |
| Estimated Cells in Pellet | -     |
| Received by               | -     |
| Date Pellet Received      | -     |
| Date DNA Received         | -     |
| DNA vol. ( $\mu$ l)       | -     |
| DNA conc. (ng/ $\mu$ l)   | -     |
| DNA quality (A260/280)    | -     |

DNA Extraction: DNeasy Blood and Tissue Kit (Qiagen, Hilden, Germany)  
DNA Analysis: Nanodrop ND1000 (Wilmington, DE)

### 2 Run Information

|                            |                              |
|----------------------------|------------------------------|
| Volume DNA Used ( $\mu$ l) | -                            |
| Amount DNA Used (ng)       | -                            |
| Run Date                   | 9 <sup>th</sup> October 2013 |
| Run File Name              | Kong_20131009                |

Cell ID Analysis: Cell ID system (Promega, Madison, WI)  
Capillary Electrophoresis: ABI 3130xl Genetic Analyser (Life Technologies, Foster City, CA)

**Appendix Fig S19.** Cell line authentication of cell lines used in this study.

### Appendix Table S1

Identification of the top 10 differentially regulated fatty acid metabolic genes in acquired resistant PC-9GR cells compared to parental PC-9P cells). Genes listed are Log<sub>2</sub> > 0.6 values (Fold-change of >1.5) and p-value < 0.05.

| Fatty acid metabolic process |            |                  |
|------------------------------|------------|------------------|
| Rank #                       | Gene Name  | Log <sub>2</sub> |
| 1                            | FASN       | 0.966            |
| 2                            | NR2F2      | 0.782            |
| 3                            | SREBF1     | 0.722            |
| 4                            | FDXR       | 0.702            |
| 5                            | ALDH5A1    | 0.657            |
| 6                            | THRSP      | 0.648            |
| 7                            | ST6GALNAC4 | 0.629            |
| 8                            | PCYT2      | 0.623            |
| 9                            | PIGV       | 0.588            |
| 10                           | IMPA1      | 0.585            |



**Appendix Table S2.** Q-PCR validation of the top 10 fatty acid metabolic genes from microarray studies. ACTB housekeeping gene was used for normalization.

| <b>Rank #</b> | <b>Gene name</b> | <b>Microarray<br/>Fold-change</b> | <b>Q-PCR<br/>Fold-change<br/>(SEM)</b> |
|---------------|------------------|-----------------------------------|----------------------------------------|
| 1             | FASN             | 1.95                              | 15.18 (0.021)                          |
| 2             | NR2F2            | 1.72                              | 2.33 (0.08)                            |
| 3             | SREBF1           | 1.65                              | 11.04 (0.228)                          |
| 4             | FDXR             | 1.63                              | 1.53 (0.07)                            |
| 5             | ALDH5A1          | 1.58                              | 3.84 (0.126)                           |
| 6             | THRSP            | 1.57                              | 3.01 (0.05)                            |
| 7             | ST6GALNAC4       | 1.55                              | 2.55 (0.09)                            |
| 8             | PCYT2            | 1.54                              | 4.66 (0.08)                            |
| 9             | PIGV             | 1.5                               | 1.38 (0.03)                            |
| 10            | IMPA1            | 1.5                               | 1.82 (0.03)                            |

**Appendix Table S3.** EGFR mutation status in lung cells adopted in this study.

| <b>Lung cell lines</b> |             |                        |                             |
|------------------------|-------------|------------------------|-----------------------------|
| <b>Cell line name</b>  | <b>Type</b> | <b>EGFR status</b>     | <b>Gefitinib resistance</b> |
| PC-9P                  | NSCLC       | delE746-A750           | No                          |
| PC-9GR                 | NSCLC       | delE746-A750           | Yes                         |
| H1975                  | NSCLC       | T790M/L858R            | Yes                         |
| H1703                  | NSCLC       | Wild-type              | Yes                         |
| NL20                   | Normal lung | Wild-type              | Yes                         |
| HCC4006P               | NSCLC       | delL747-<br>A749/A750P | No                          |
| HCC4006GR              | NSCLC       | delL747-<br>A749/A750P | Yes                         |
| H1650                  | NSCLC       | delE746-A750           | Yes                         |
| H820                   | NSCLC       | delE746-<br>A749/T790M | Yes                         |

**Appendix Table S4.** List of primer sequences used for quantitative PCR in this study.

| Gene       |   | Sequence (5' - 3')      | PrimerBank ID | Amplicon size (bp) |
|------------|---|-------------------------|---------------|--------------------|
| FASN       | F | AAGGACCTGTCTAGGTTTGATGC | 41872630c1    | 106                |
|            | R | TGGCTTCATAGGTGACTTCCA   |               |                    |
| NR2F2      | F | TCATGGGTATCGAGAACATTTGC | 223555950c1   | 151                |
|            | R | TTCAACACAAACAGCTCGCTC   |               |                    |
| SREBF1     | F | GCCCCTGTAACGACCACTG     | 256665250c2   | 84                 |
|            | R | CAGCGAGTCTGCCTTGATG     |               |                    |
| FDXR       | F | CTGAGGCAGAGTTCGAGTGAAG  | 111118982c1   | 85                 |
|            | R | CCCGAAGCTCCTTAATGGTGA   |               |                    |
| ALDH5A1    | F | AGGGGAGGCAATTTGTAAGTGA  | 25777720c3    | 85                 |
|            | R | GTGGTGCAACAGGATCTTTCC   |               |                    |
| THRSP      | F | CAGGTGCTAACCAAGCGTTAC   | 318037251c1   | 108                |
|            | R | CAGAAGGCTGGGGATCATCA    |               |                    |
| ST6GALNAC4 | F | TGTGAGGAGATCGTGGTCTATG  | 88999589c2    | 85                 |
|            | R | CAAAGTAGTGGTAAGGCACTGAG |               |                    |
| PCYT2      | F | TGTCCACCACAGACCTCGT     | 374253759c1   | 89                 |
|            | R | ATACTCCCGGTAAGTACAGAGGA |               |                    |
| PIGV       | F | ACACCCAATTCTGTCTGCCAG   | 322309841c3   | 78                 |
|            | R | GGTAGCCCTTGTCTACAGCTAAC |               |                    |
| IMPA1      | F | TAACTCTAGCAAGACAAGCTGGA | 221625506c1   | 115                |
|            | R | TCAACTTTTTGGTCCGTAGCAG  |               |                    |
| ACTB       | F | CATGTACGTTGCTATCCAGGC   | 4501885a1     | 250                |
|            | R | CTCCTTAATGTCACGCACGAT   |               |                    |
| tGFP       | F | AGGACAGCGTGATCTTCACC    |               | 92                 |
|            | R | GCTGCCATCCAGATCGTTAT    |               |                    |
